# Supplementary material for: Natural infection by Zika virus but not DNA vaccination consistently elicits antibodies that compete with two potently neutralising monoclonal antibodies targeting distinct epitopes
Source: PubMed Central journal article supplement — eBioMedicine. 2023 Nov 18;98:104875. doi: 10.1016/j.ebiom.2023.104875 (PMC10694573; doi:10.1016/j.ebiom.2023.104875), 2023-11-18

SUPPLEMENTAL MATERIAL

Title: Natural infection by Zika virus but not DNA vaccination consistently elicits antibodies that compete with two potentially neutralising monoclonal antibodies targeting distinct epitopes

**Table S1. Screen for flavivirus neutralising antibodies in VRC320 study prior to vaccination**

| GROUP1 | DENV1 | DENV2 | DENV3 | DENV4 | ZIKV | GROUP2 | DENV1 | DENV2 | DENV3 | DENV4 | ZIKV | GROUP3 | DENV1 | DENV2 | DENV3 | DENV4 | ZIKV |
|--------|-------|-------|-------|-------|------|--------|-------|-------|-------|-------|------|--------|-------|-------|-------|-------|------|
| 101    |       |       |       |       |      | 201    |       |       |       |       |      | 301    |       |       |       |       |      |
| 102    |       |       |       |       |      | 202    |       |       |       |       |      | 302    |       |       |       |       |      |
| 103    |       |       |       |       |      | 203    |       |       |       |       |      | 303    |       |       |       |       |      |
| 104    |       |       |       |       |      | 204    |       |       |       |       |      | 304    |       |       |       |       |      |
| 105    |       |       |       |       |      | 205    |       |       |       |       |      | 305    |       |       |       |       |      |
| 107    |       |       |       |       |      | 206    | +     | +     | +     | +     |      | 306    |       |       |       |       |      |
| 108    |       |       |       |       |      | 207    |       |       |       |       |      | 307    |       |       |       |       |      |
| 109    |       |       |       |       |      | 208    | +     | +     | +     | +     |      | 308    |       |       |       |       |      |
| 110    |       |       |       |       |      | 209    |       |       |       |       |      | 309    |       |       |       |       |      |
| 111    |       |       |       |       |      | 210    |       |       |       |       |      | 311    |       |       |       |       |      |
| 112    | +     | +     | +     | +     | +    | 211    |       |       |       |       |      | 312    | +     | +     | +     |       |      |
| 113    |       |       |       |       |      | 212    |       |       |       |       |      | 313    |       |       |       |       |      |
| 114    |       |       |       |       |      | 213    |       |       |       |       |      | 314    |       |       |       |       |      |
| 115    |       |       |       |       |      | 214    |       |       |       |       |      | 315    |       |       |       |       |      |
|        |       |       |       |       |      | 215    |       |       |       |       |      |        |       |       |       |       |      |

**Table S2. Calculated sdFRNT50 values for ZIKV in VRC320 v2 samples**

|            |      |            |      |            |      |
|------------|------|------------|------|------------|------|
| VCR320 101 | 8.6  | VCR320 101 | 12.8 | VCR320 101 | 1.8  |
| VCR320 102 | 9.2  | VCR320 102 | 14.6 | VCR320 102 | 1.1  |
| VCR320 103 | 18.5 | VCR320 103 | 7.3  | VCR320 103 | 8.8  |
| VCR320 104 | 8.9  | VCR320 104 | 0.0  | VCR320 104 | 7.0  |
| VCR320 105 | 8.9  | VCR320 105 | 1.7  | VCR320 105 | 0.0  |
| VCR320 106 | 21.6 | VCR320 206 | 29.5 | VCR320 307 | 4.2  |
| VCR320 107 | 6.5  | VCR320 207 | 18.4 | VCR320 308 | 16.8 |
| VCR320 108 | 1.0  | VCR320 208 | 34.4 | VCR320 309 | 9.1  |
| VCR320 109 | 5.1  | VCR320 209 | 0.0  | VCR320 310 | 8.1  |
| VCR320 111 | 0.0  | VCR320 210 | 3.1  | VCR320 311 | 2.5  |
| VCR320 112 | 72.6 | VCR320 211 | 34.0 | VCR320 312 | 22.0 |
| VCR320 113 | 13.7 | VCR320 212 | 20.5 | VCR320 313 | 24.1 |
| VCR320 114 | 4.8  | VCR320 213 | 0.0  | VCR320 314 | 10.5 |
| VCR320 115 | 3.1  | VCR320 214 | 0.0  | VCR320 315 | 7.4  |
|            |      | VCR320 215 | 6.9  |            |      |

Figure S1. Optimising serum concentration for A9E and G9E BOB

**A**

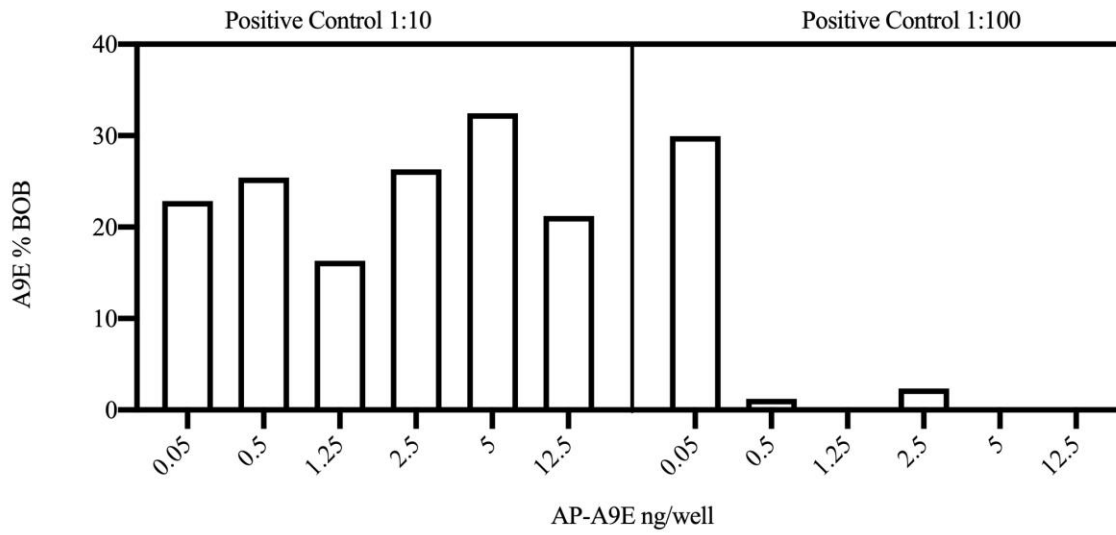

**B**

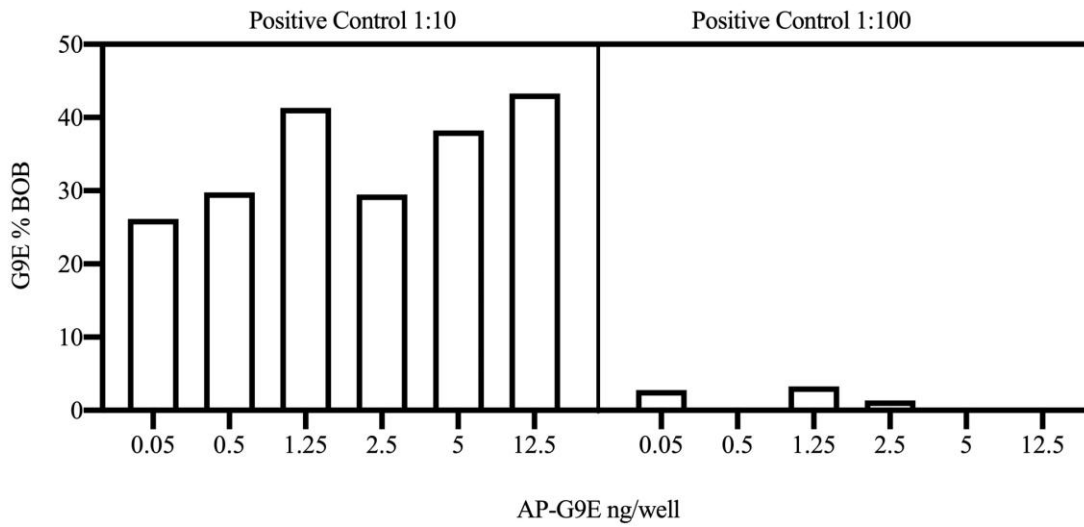

Figure S2. sdFNRT50 screening of VCR320 pre-vaccine sera for DENV neutralising antibodies

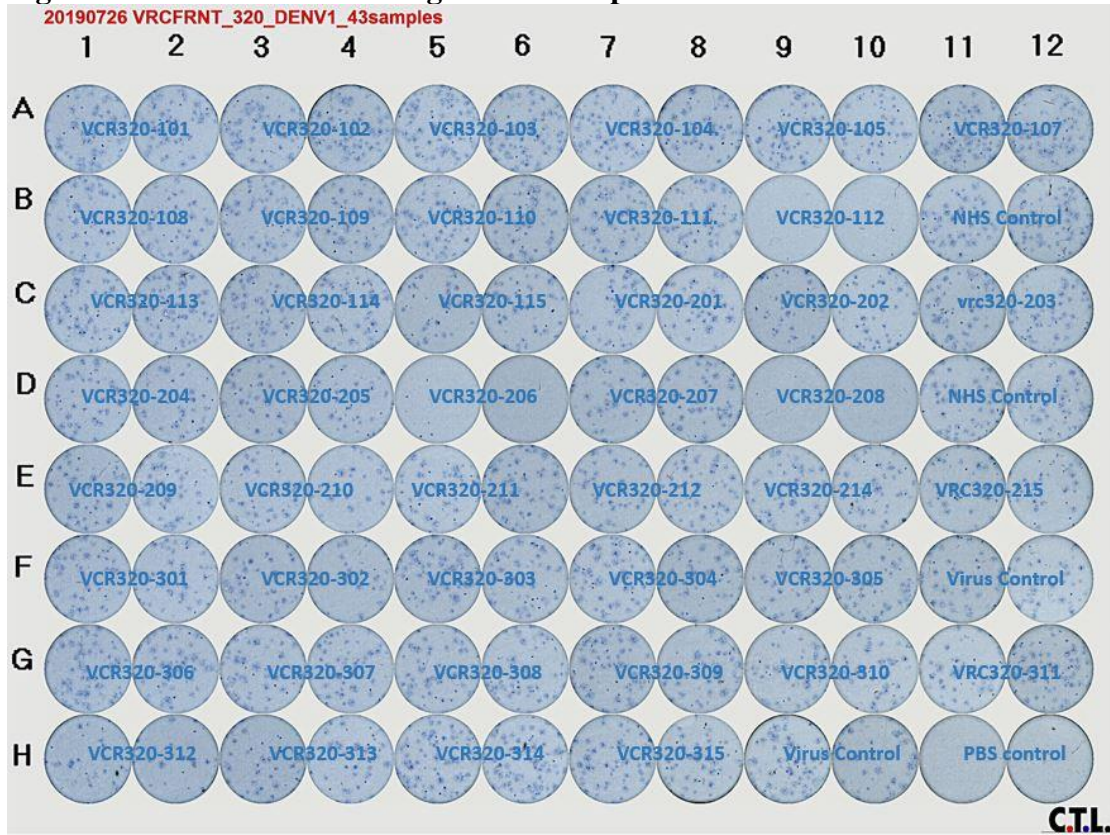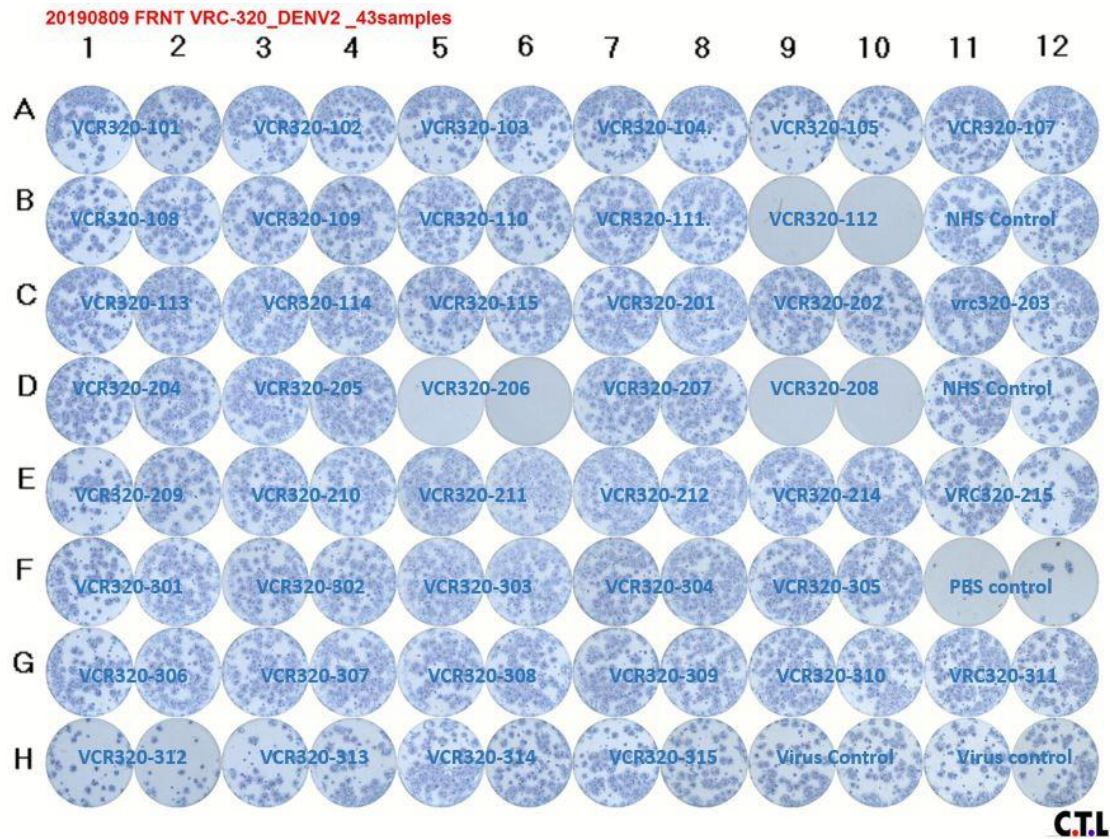



20191018 FRNT\_VRC320\_V2\_D3

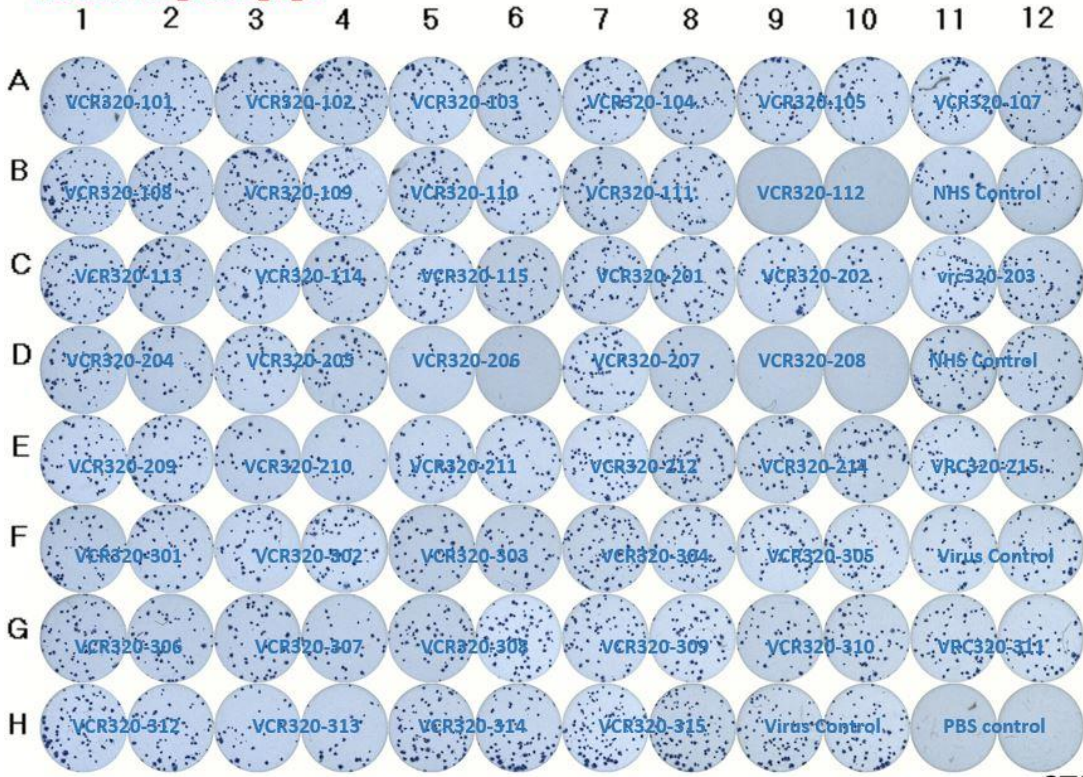

CTL

20191018 FRNT\_VRC320\_V2\_D4

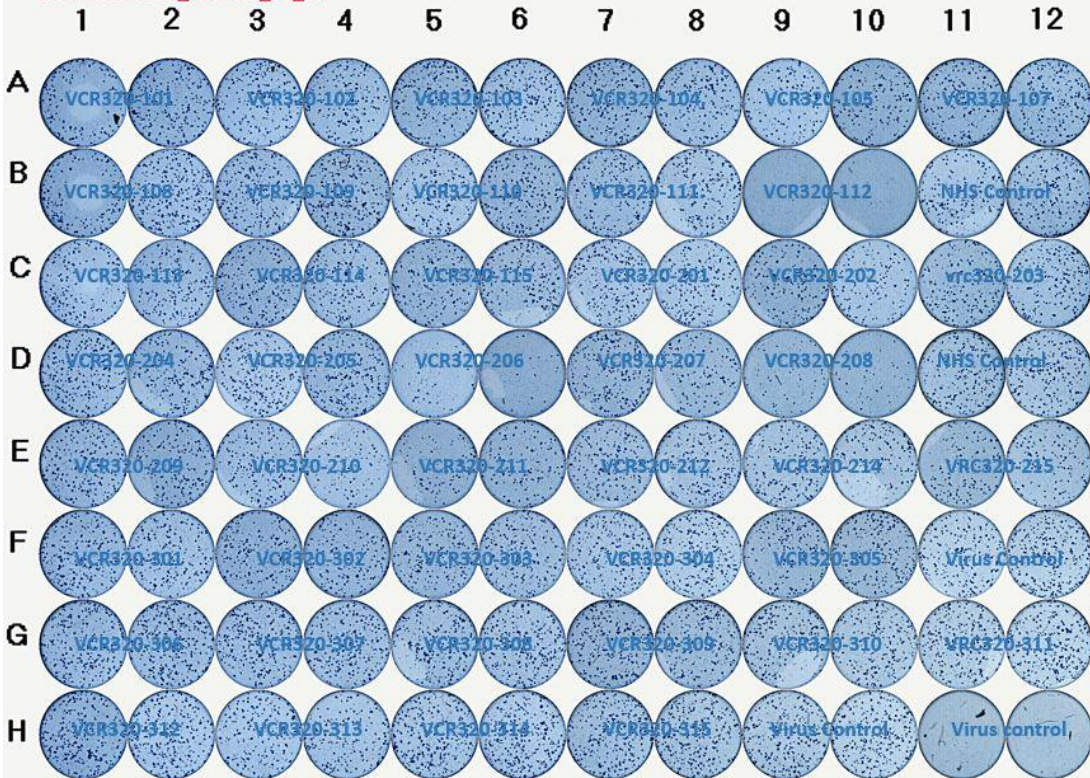

CTL

**Figure S3. A9E and G9E %BOB measured in longitudinal samples from VRC320**

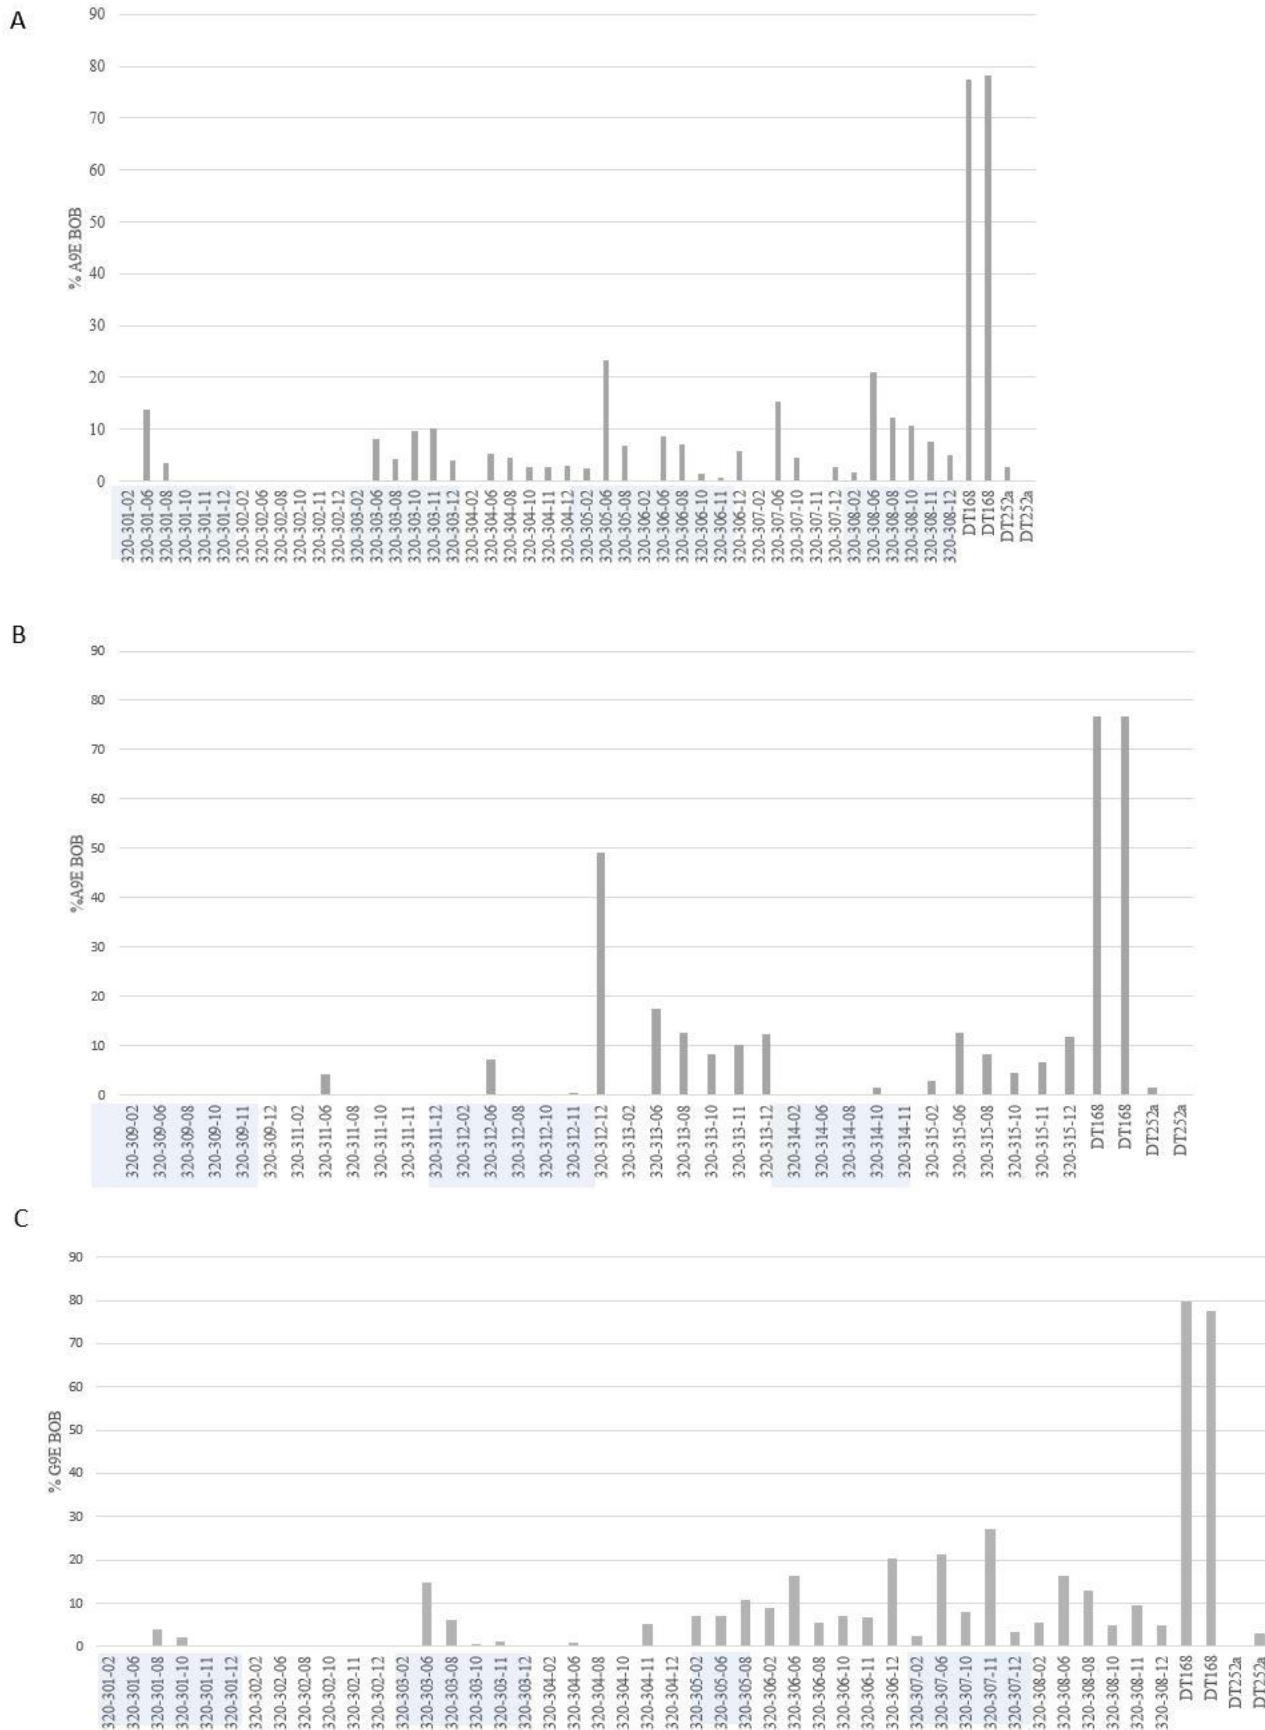

D

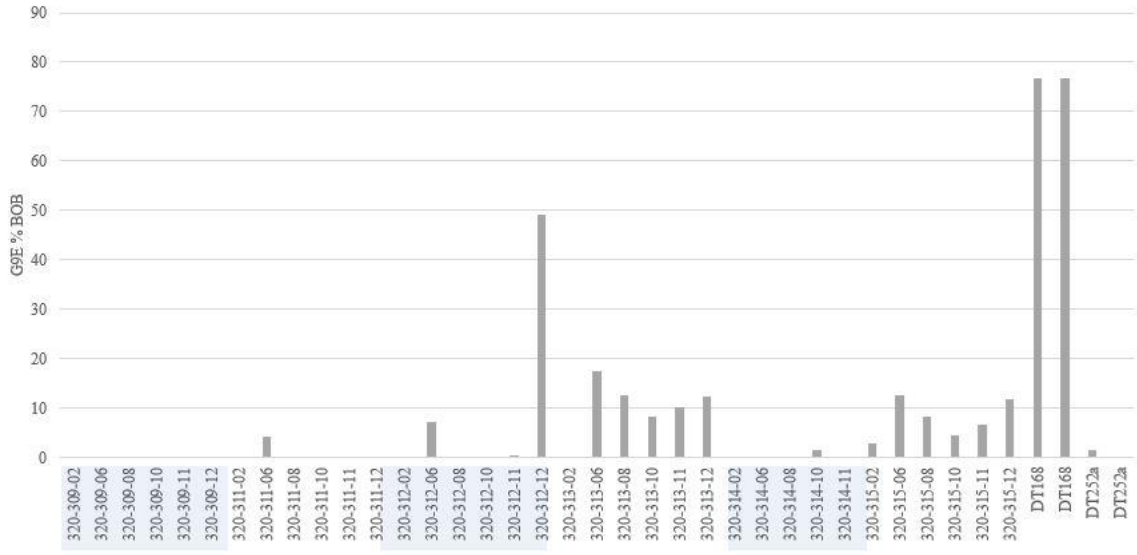

Supplement: mmc1.pdf [file mmc1.pdf]
